# Supplementary material for: Reactions of green and black teas with Cu(ii)
Source: Royal Society of Chemistry journal article supplement (doi:10.1039/c1fo10086f), 2011-12-13
Supplement: c1fo10086f.pdf [file c1fo10086f.pdf]

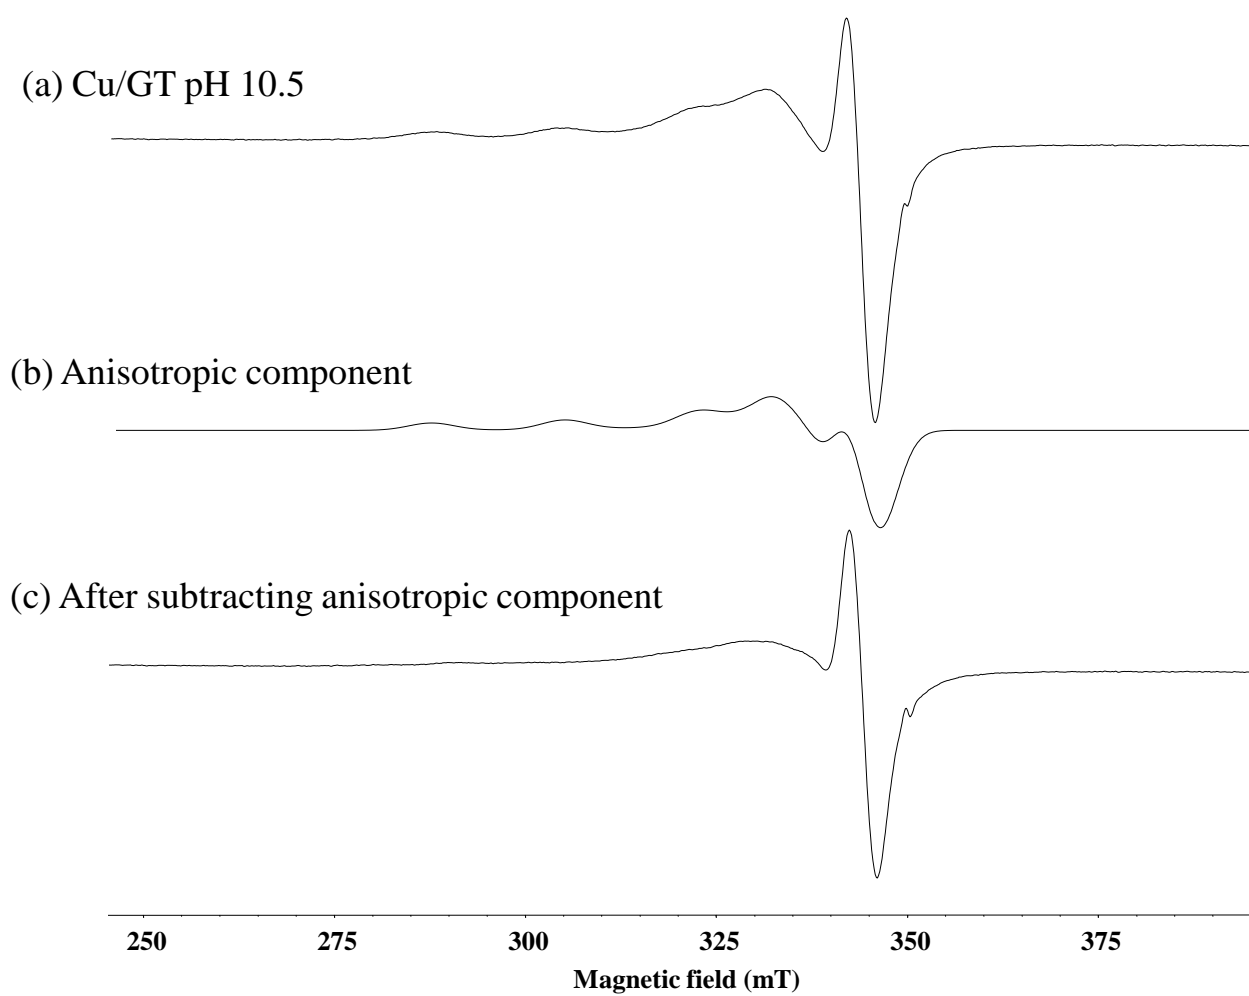

Figure S1

# Cu/GT (1:1) 50% MeOH RT

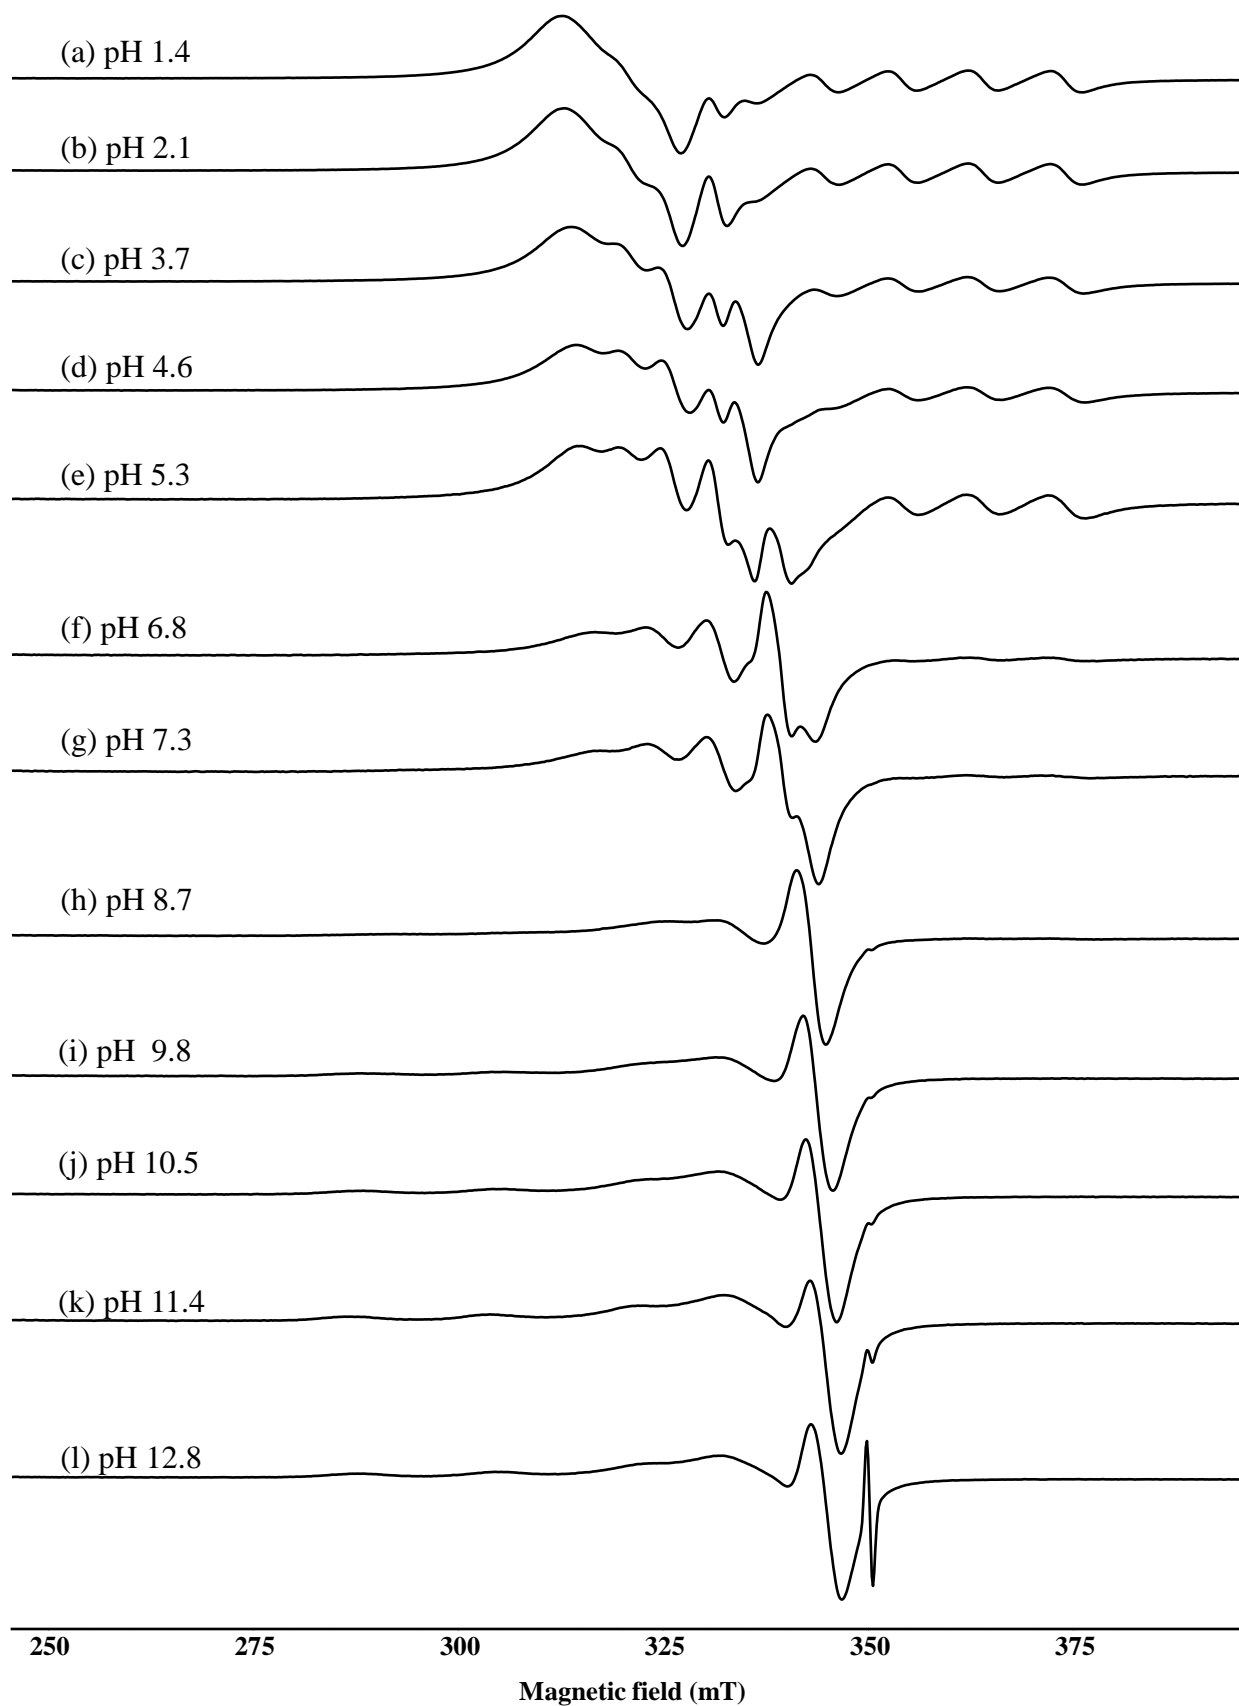

Figure S2

### Cu/GT (1:5) 50% MeOH RT

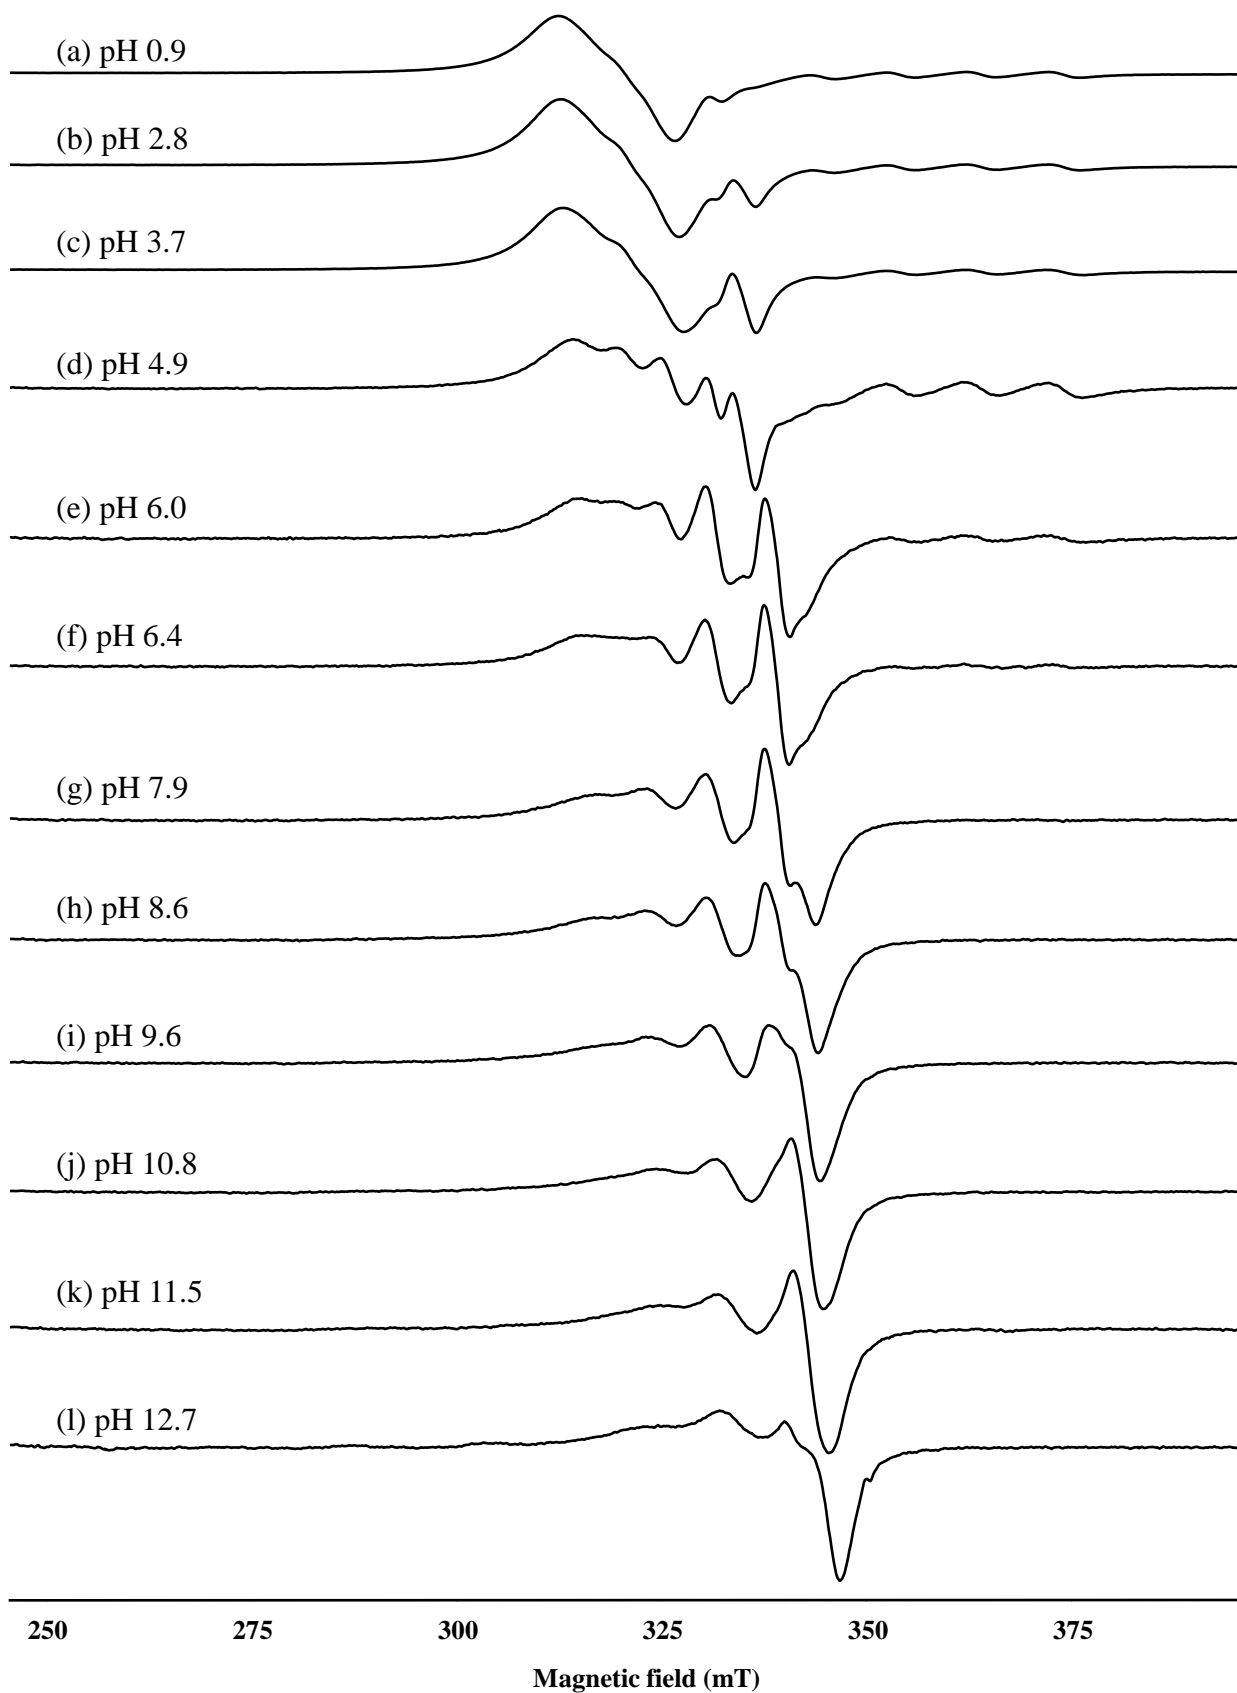

Figure S3

## Cu/BT (1:1) 50% MeOH RT

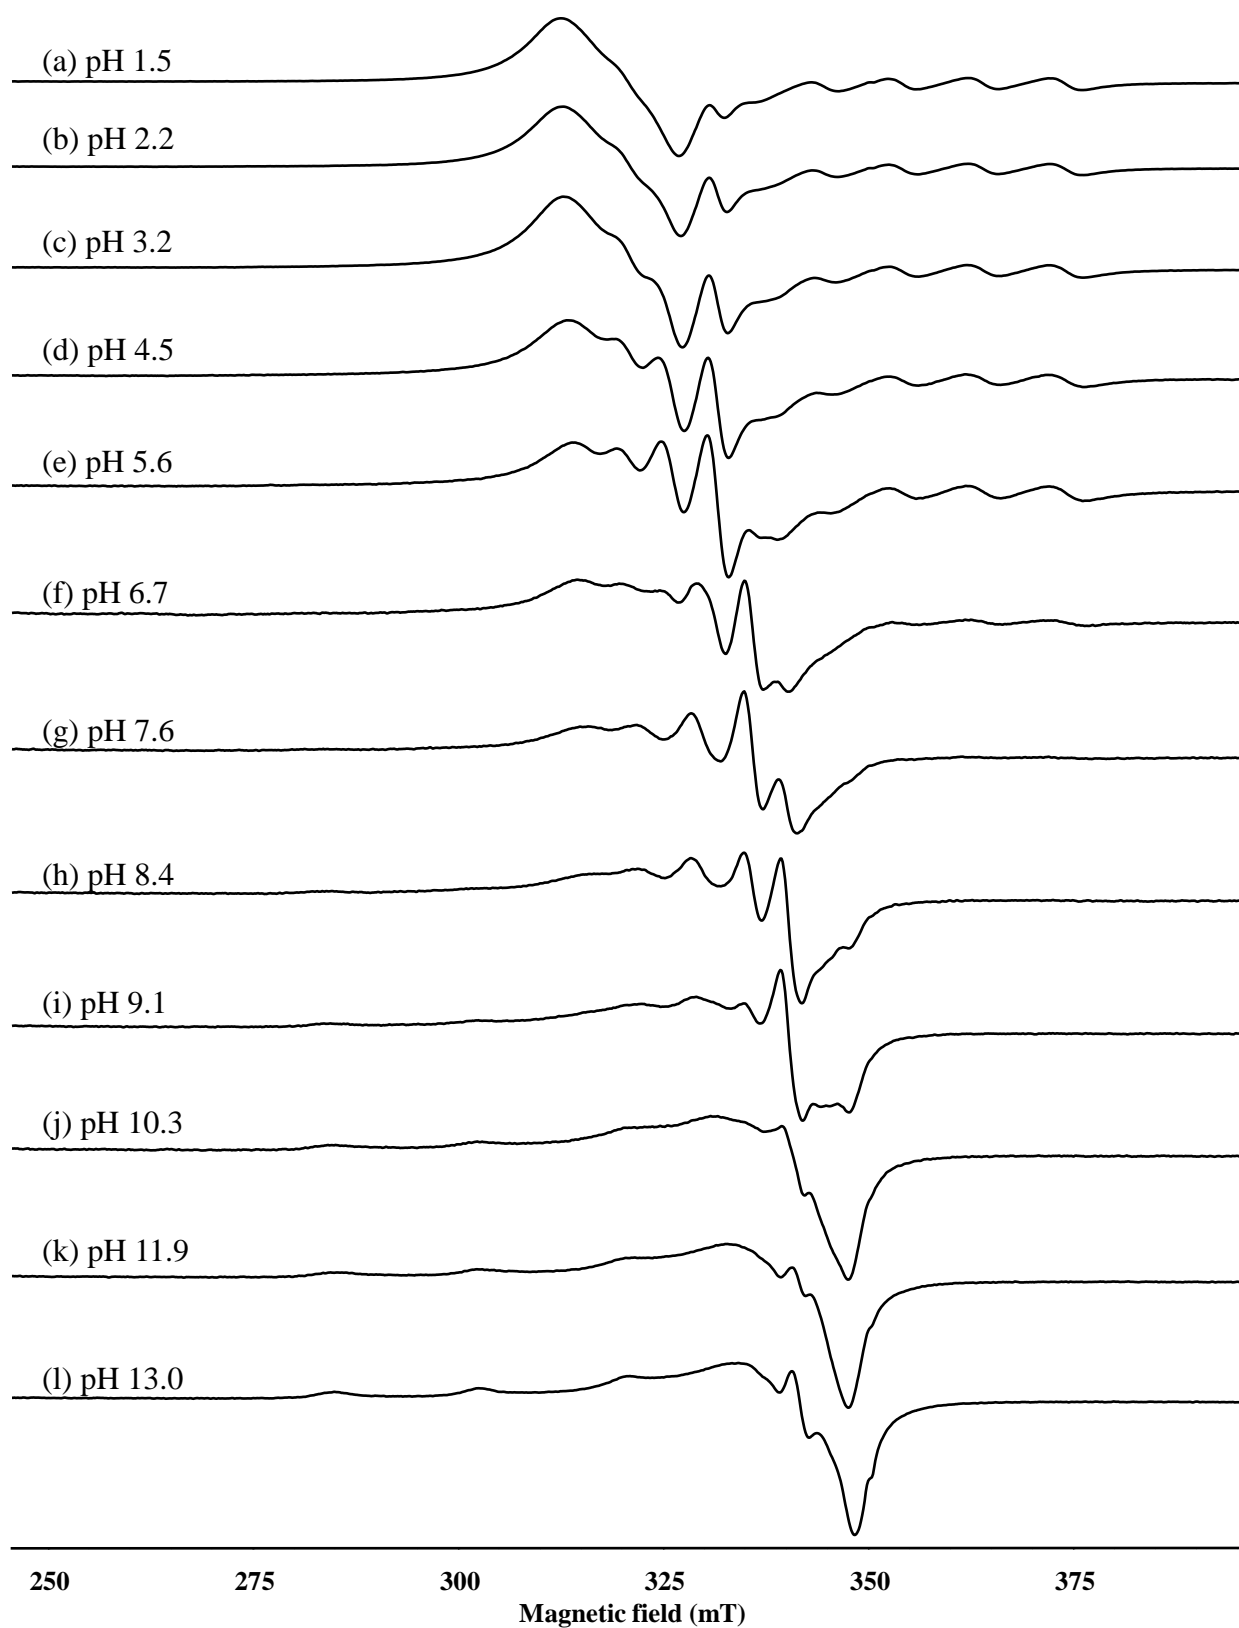

Figure S4

### Cu/BT (1:5) 50% MeOH RT

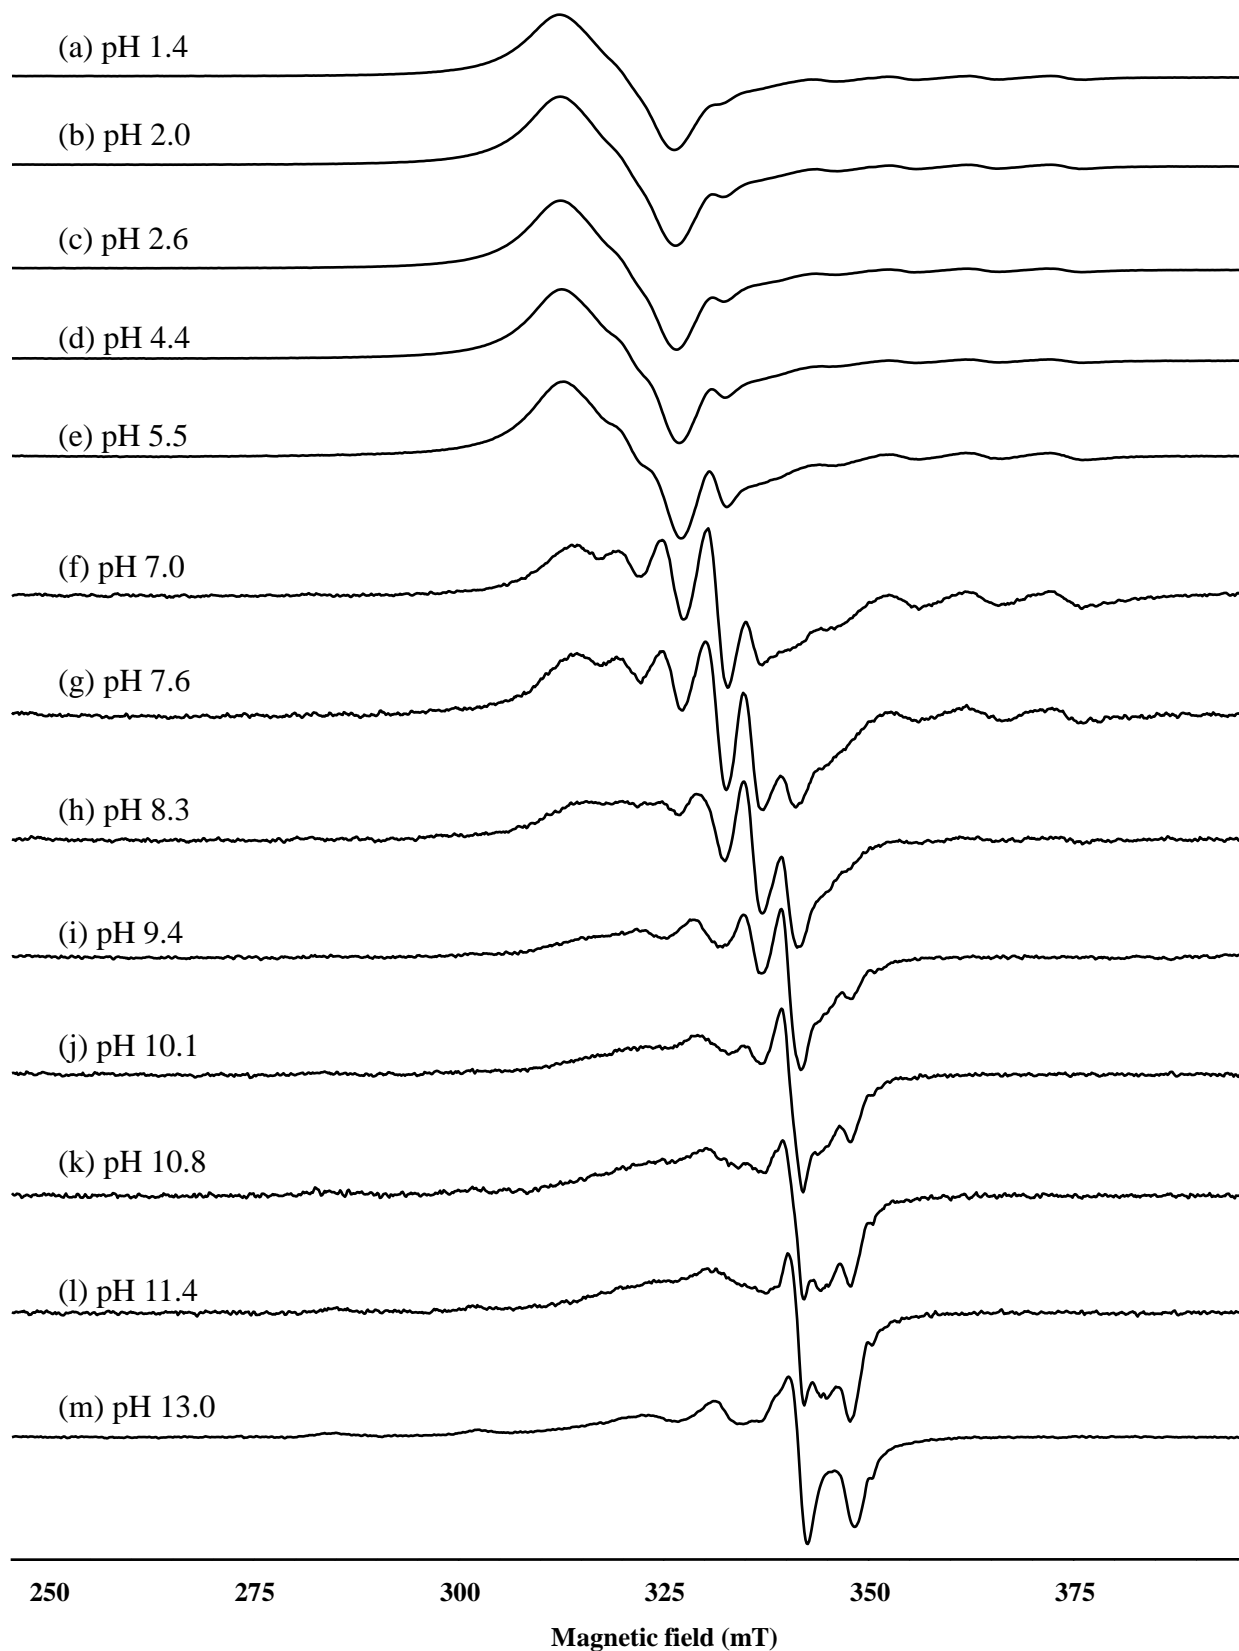

Figure S5

## Cu/GT (1:1) 50% MeOH 77K

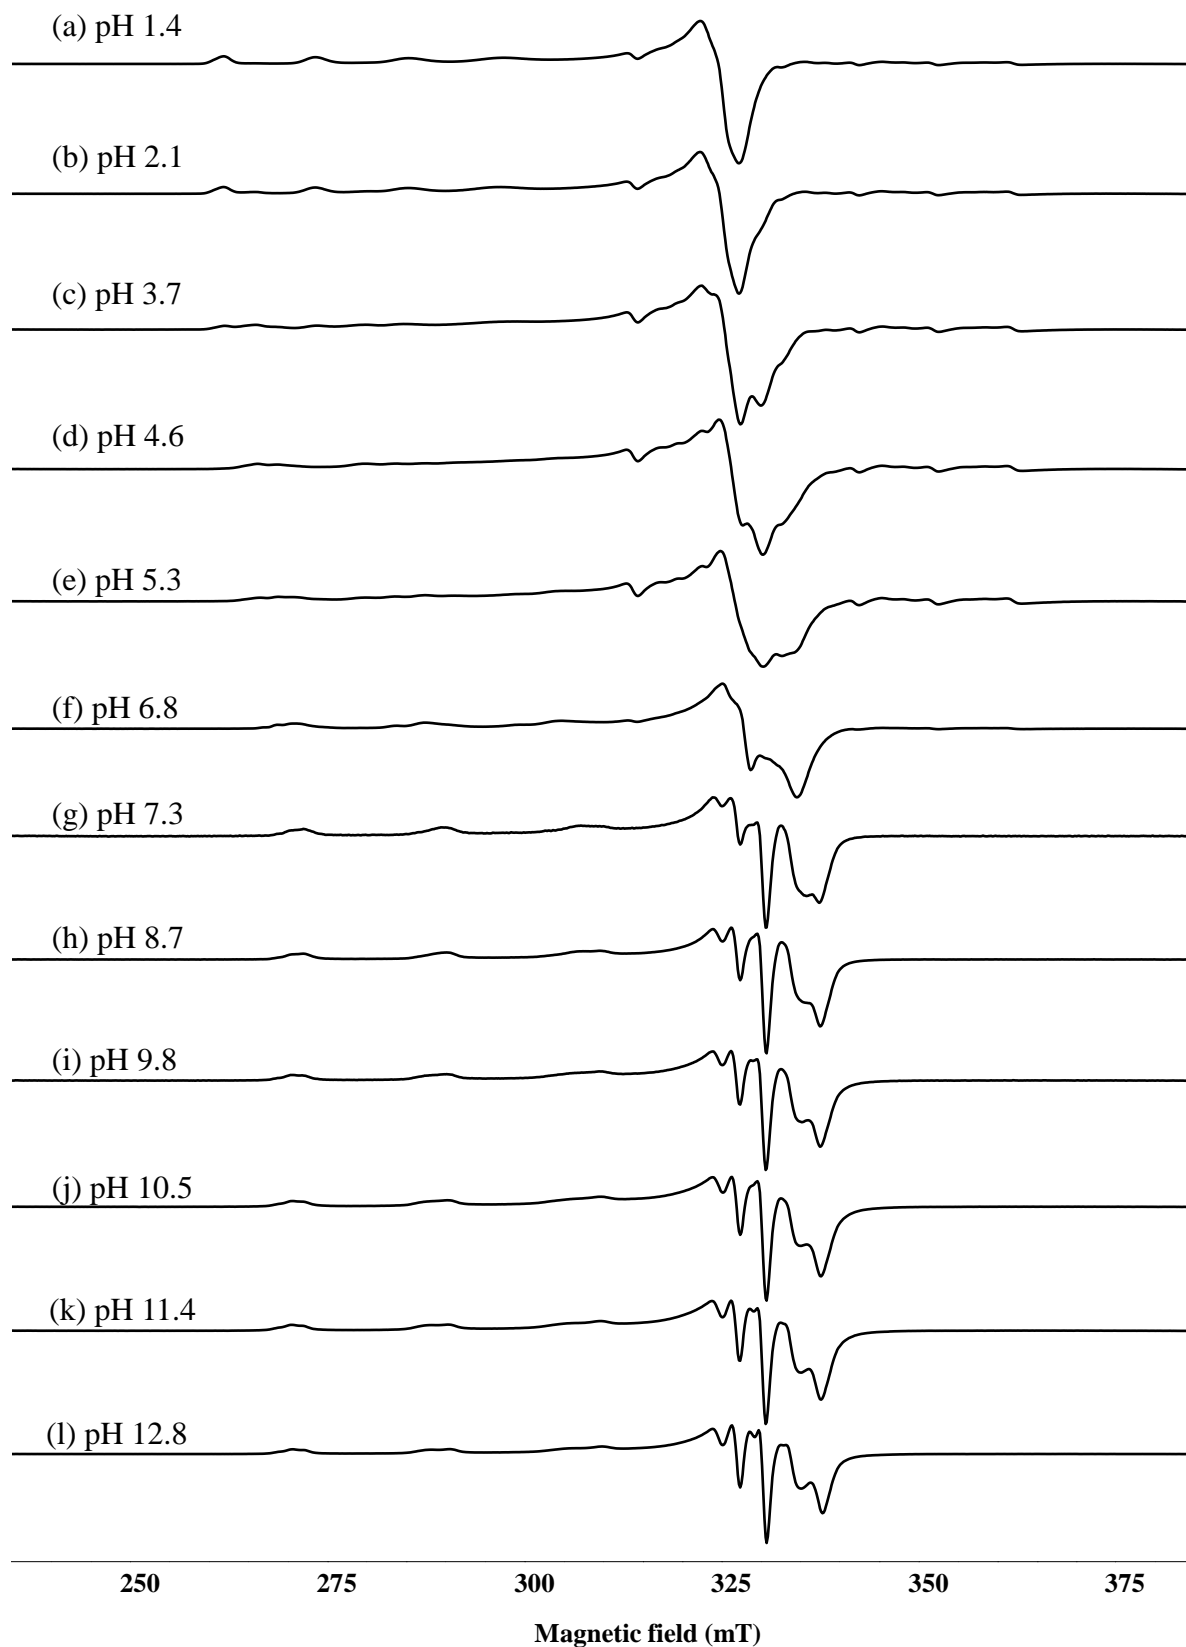

Figure S6

# Cu/GT (1:5) 50% MeOH 77K

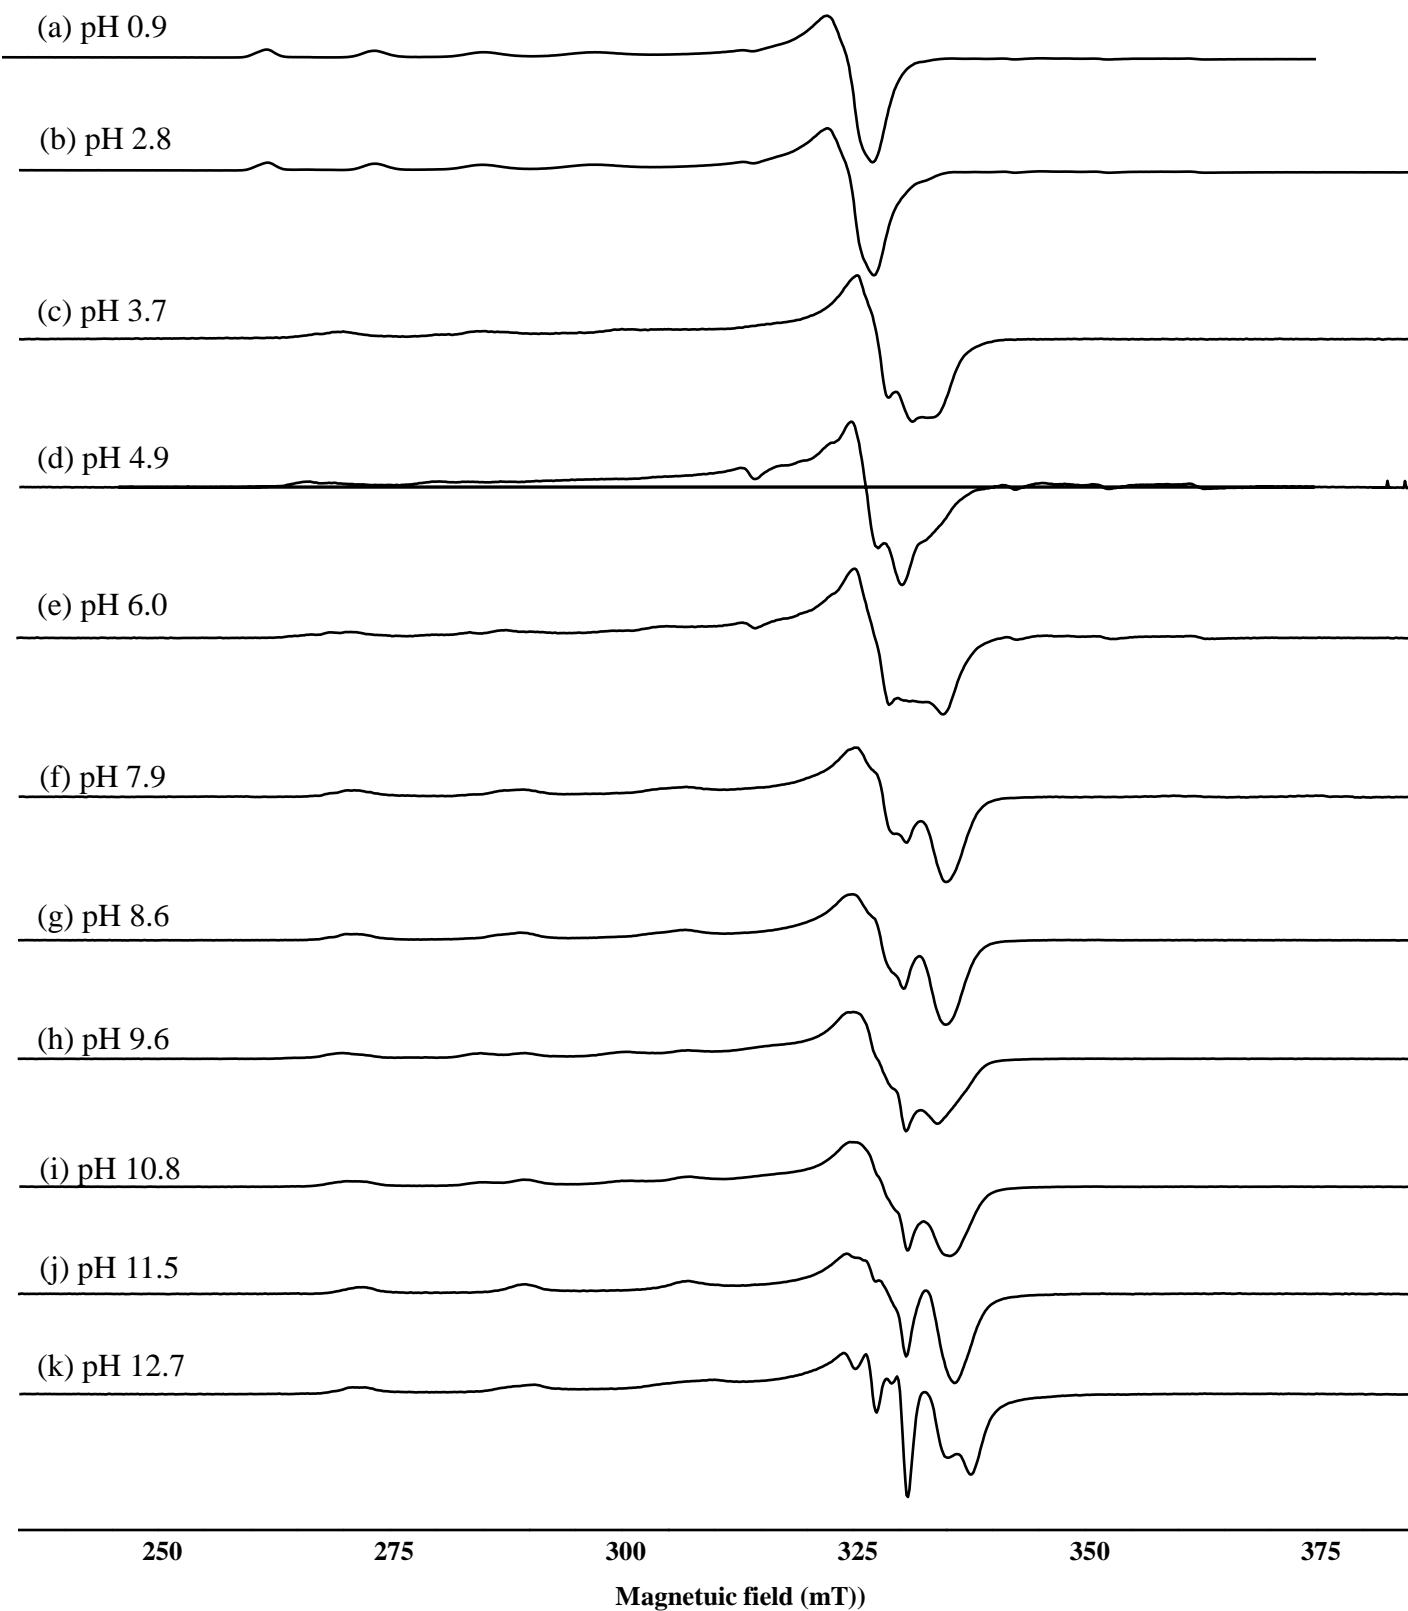

Figure S7

## Cu/BT (1:1) 50% MeOH 77K

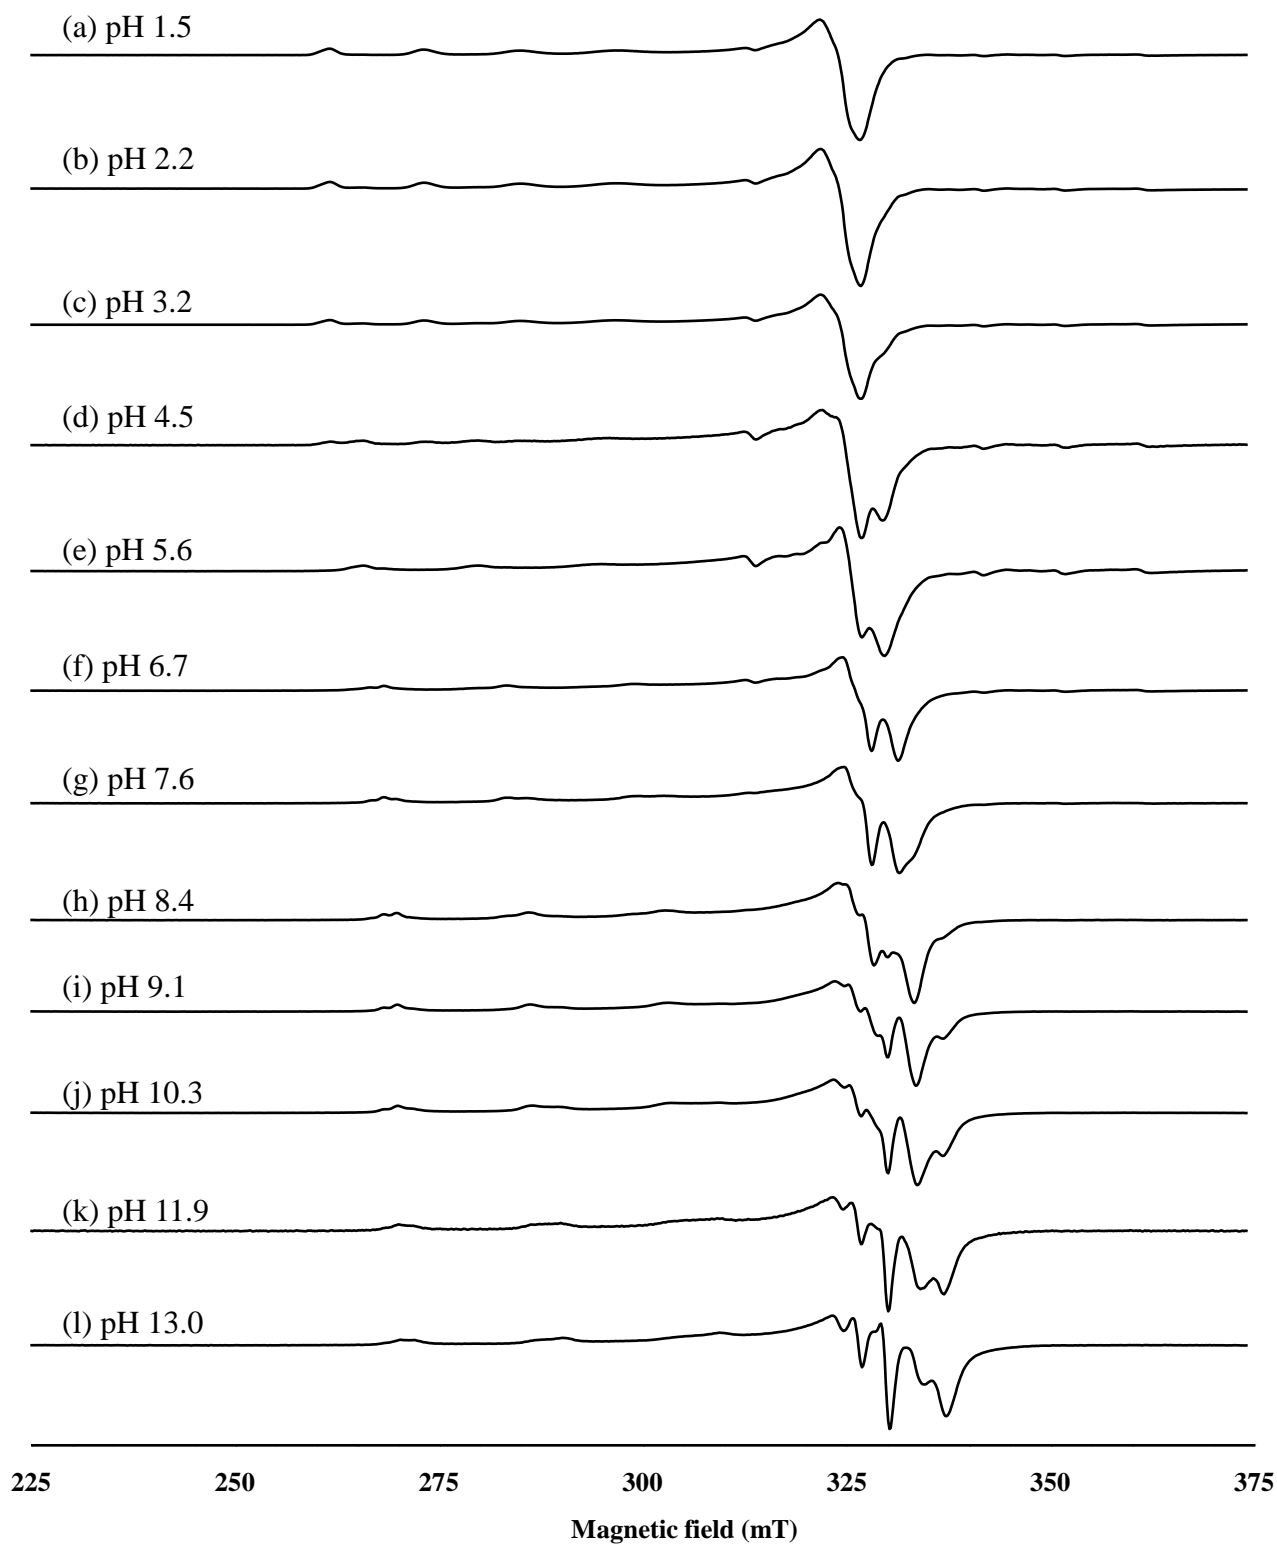

Figure S8



### Cu/BT (1:5) 50% MeOH 77K

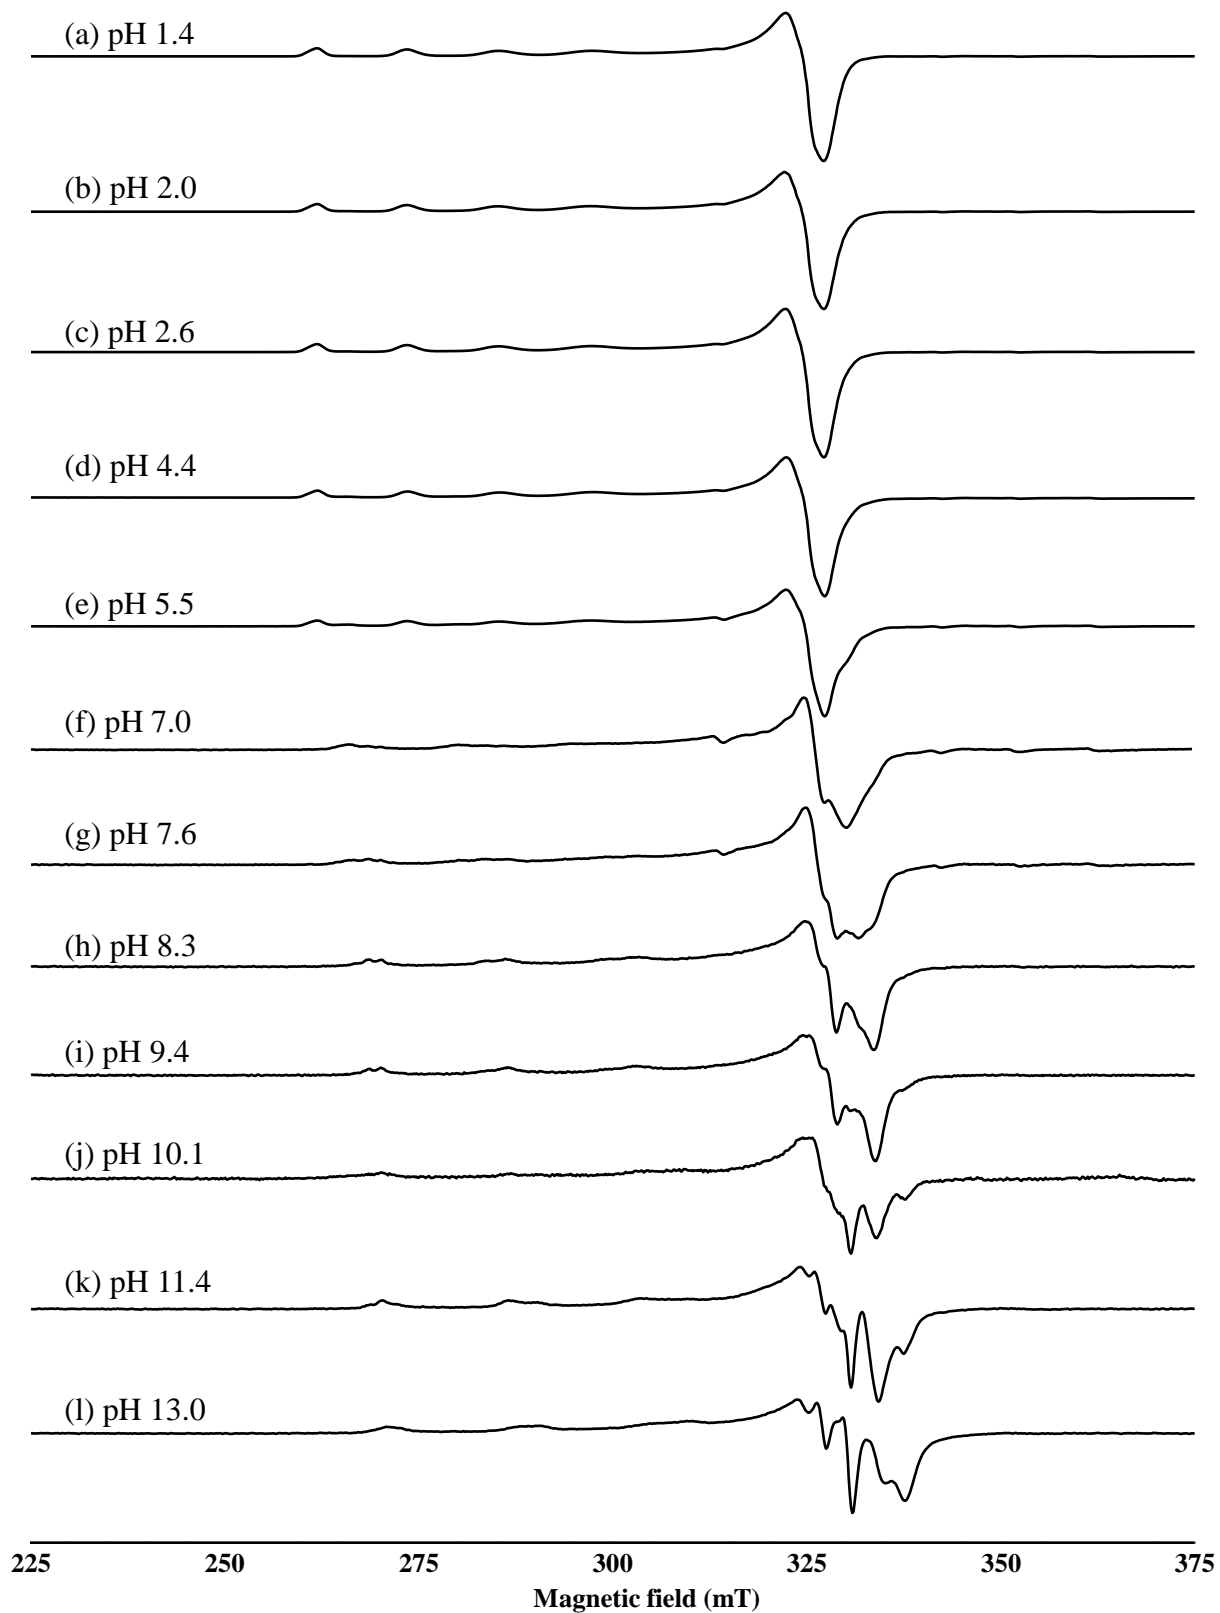

Figure S9

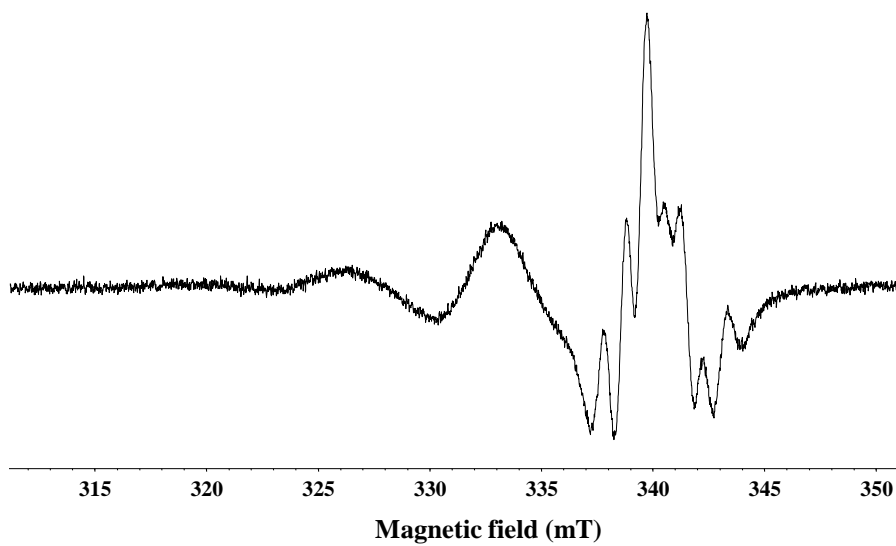

Figure S10

## Supplementary Figures

Figure S1. (a) Fluid solution EPR spectrum at room temperature of 5% glycerol solution of green tea containing 2 mM Cu(II) at pH 10.5, (b) simulation of the anisotropic component in (a), (c) residual spectrum after subtracting spectrum (b) from (a).

Figure S2. Dependence on pH of the fluid solution EPR spectra of 4 mM Cu(II) in aqueous green tea extract diluted 1:1 in methanol, (a) pH 1.4, (b) pH 2.1, (c) pH 3.7, (d) pH 4.6, (e) pH 5.3, (f) pH 6.8, (g) pH 7.3, (h) pH 8.7, (i) pH 9.8, (j) pH 10.5, (k) pH 11.4, (l) pH 12.8

Figure S3. Dependence on pH of the fluid solution EPR spectra of 4 mM Cu(II) in aqueous green tea extract diluted 1:5 in (1:1) aqueous methanol, (a) pH 0.9, (b) pH 2.8, (c) pH 3.7, (d) pH 4.9, (e) pH 6.0, (f) pH 6.4, (g) pH 7.9, (h) pH 8.6, (i) pH 9.65, (j) pH 10.8, (k) pH 11.5, (l) pH 12.7.

Figure S4. Dependence on pH of the fluid solution EPR spectra 4 mM Cu(II) in aqueous Pu'er tea extract diluted 1:1 in methanol, (a) pH 1.5, (b) pH 2.2, (c) pH 3.2, (d) pH 4.5, (e) pH 5.6, (f) pH 6.7, (g) pH 7.6, (h) pH 8.4, (i) pH 9.1, (j) pH 10.3, (k) pH 11.9, (l) pH 13.0.

Figure S5. Dependence on pH of the fluid solution EPR spectra of 4 mM Cu(II) in aqueous Pu'er tea extract diluted 1:5 in (1:1) aqueous methanol, (a) pH 1.4, (b) pH 2.0, (c) pH 2.6, (d) pH 4.4, (e) pH 5.5, (f) pH 7.0, (g) pH 7.6, (h) pH 8.3, (i) pH 9.4, (j) pH 10.1, (k) pH 10.8, (l) pH 11.4, (m) pH 13.0

Figure S6. Dependence on pH of the EPR spectra at 77K of 4 mM Cu(II) in aqueous green tea extract diluted 1:1 in methanol, (a) pH 1.4, (b) pH 2.1, (c) pH 3.7, (d) pH 4.6, (e) pH 5.3, (f) pH 6.8, (g) pH 7.3, (h) pH 8.7, (i) pH 9.8, (j) pH 10.5, (k) pH 11.4, (l) pH 12.8

Figure S7. Dependence on pH of the EPR spectra at 77K of 4 mM Cu(II) in aqueous green tea extract diluted 1:5 in (1:1) aqueous methanol, (a) pH 0.94, (b) pH 2.80, (c) pH 3.67, (d) pH 4.92, (e) pH 6.02, (f) pH 7.87, (g) pH 8.57, (h) pH 9.55, (i) pH 10.80, (j) pH 11.51, (k) pH 12.74.

Figure S8. Dependence on pH of the EPR spectra at 77K of 4 mM Cu(II) in aqueous Pu'er tea extract diluted 1:1 in methanol, (a) pH 1.5, (b) pH 2.2, (c) pH 3.2, (d) pH 4.5, (e) pH 5.6, (f) pH 6.7, (g) pH 7.6, (h) pH 8.4, (i) pH 9.1, (j) pH 10.3, (k) pH 11.9, (l) pH 13.0.

Figure S9. Dependence on pH of the EPR spectra at 77K of 4 mM Cu(II) in aqueous Pu'er tea extract diluted 1:5 in (1:1) aqueous methanol, (a) pH 1.4, (b) pH 2.0, (c) pH 2.6, (d) pH 4.4, (e) pH 5.5, (f) pH 7.0, (g) pH 7.6, (h) pH 8.3, (i) pH 9.4, (j) pH 10.1, (k) pH 11.4, (m) pH 13.0

Figure S10. 2<sup>nd</sup> derivative recording of the <sup>63</sup>Cu *bis* complex with theanine in NaOD at pH 10
